# Supplementary material
Source: Springer Nature journal article supplement (https://www.springermedizin.de/resource/supplementary/12913_2012_2334_MOESM6_ESM.pdf/9529584)
Supplement: MOESM6 [file 9529584]

| Training Method                                                                                        | Materials                                  | Training Session 1<br>Content and Core Skills                                                                                                                                                                                                                                                                                                                                               | Training Session 2<br>Content and Core Skills                                                                                                                                                                                                                                               |
|--------------------------------------------------------------------------------------------------------|--------------------------------------------|---------------------------------------------------------------------------------------------------------------------------------------------------------------------------------------------------------------------------------------------------------------------------------------------------------------------------------------------------------------------------------------------|---------------------------------------------------------------------------------------------------------------------------------------------------------------------------------------------------------------------------------------------------------------------------------------------|
| Didactic - concepts, rationale and specific skills                                                     | Teaching Guide and Participant Workbook    | <ul style="list-style-type: none"> <li>• Introduction, background and overview</li> <li>• Element 1: salient concern</li> <li>• Element 2: making a link</li> <li>• Element 3: brief intervention with OPEN</li> <li>• Recap</li> </ul>                                                                                                                                                     | <ul style="list-style-type: none"> <li>• Review of Elements 1, 2 and 3</li> <li>• Element 4: assess patient’s readiness to change</li> <li>• Element 5: responding in alignment</li> <li>• Recap</li> </ul>                                                                                 |
| Skill demonstration                                                                                    | Video Clips & Case Scenarios               | <ul style="list-style-type: none"> <li>• Good and Poor Examples of ETMCP</li> <li>• Salient concern collage</li> <li>• Salient concern demonstration-case introductions: Mr. Brown &amp; Mrs. Hinz</li> <li>• Making a link demonstration-case continuation: Mr. Brown &amp; Mrs. Hinz</li> <li>• Brief intervention demonstration: case continuation: Mr. Brown &amp; Mrs. Hinz</li> </ul> | <ul style="list-style-type: none"> <li>• Assessing readiness to change collage</li> <li>• Assessing readiness to change demonstration – case continuation: Mr. Brown and Mrs. Hinz</li> <li>• Responding in alignment demonstration – case continuation: Mr. Brown and Mrs. Hinz</li> </ul> |
| Skill practices with feedback from trainers and opportunity to provide feedback to other participants. | Skill Practices with standardized patients | <ul style="list-style-type: none"> <li>• SP 1: Identifying a salient concern – classroom practice</li> <li>• SP 2: Making a link and brief intervention – classroom practice</li> <li>• SP 3: Putting it together- salient concern, link and brief intervention – exam room practice</li> </ul>                                                                                             | <ul style="list-style-type: none"> <li>• SP 4: Assessing patient’s readiness to change – classroom practice</li> <li>• SP 5: Responding in alignment -classroom practice</li> <li>• SP 6: Entire ETMC Process – all 5 elements, exam room practice</li> </ul>                               |
